# Supplementary material for: Air-expansion induced hierarchically porous carbonaceous aerogels from biomass materials with superior lithium storage properties
Source: Royal Society of Chemistry journal article supplement (doi:10.1039/c5ra22435g), 2016-01-01
Supplement: c5ra22435g1.pdf [file c5ra22435g1.pdf]

### Supplementary Information

## Air-expansion induced hierarchically porous carbonaceous aerogels from biomass materials with superior lithium storage properties

Pei Han<sup>a,1</sup>, Bo Yang<sup>a,1</sup>, Zhaozheng Qiu<sup>a</sup>, Yajie You<sup>a</sup>, Jing Jiang<sup>a</sup>, Jianhong Liu<sup>a</sup>, Jian Xu<sup>b</sup>, Haosen Fan<sup>a,b\*</sup>,  
Caizhen Zhu<sup>a\*</sup>

<sup>a</sup>College of Chemistry and Chemical Engineering of Shenzhen University, Shenzhen 518060, China

<sup>b</sup>Institute of Chemistry, Chinese Academy of Sciences, Beijing 100190, China

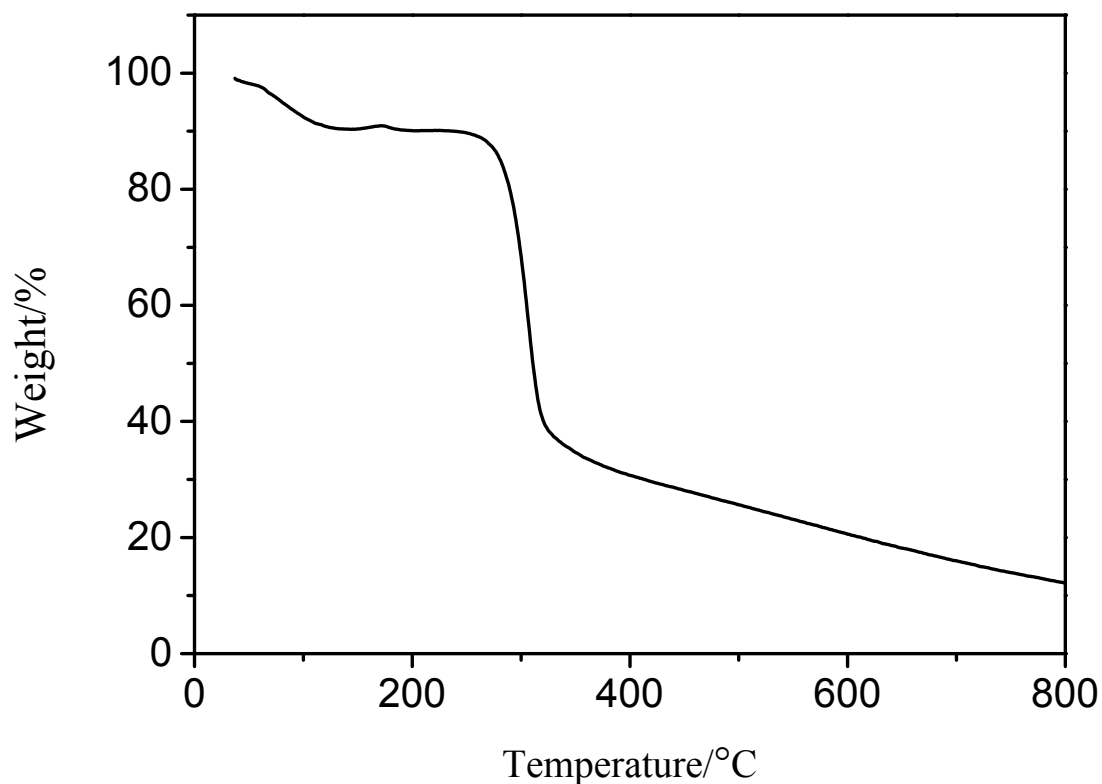

**Fig S1.** TGA curve of puffed rice under N<sub>2</sub> with a ramp of 10 °C min<sup>-1</sup>.

\* Corresponding author. Tel/Fax: 86-755-26535427  
E-mail address: czzhu@szu.edu.cn (C. Zhu), fhs@iccas.ac.cn (H. Fan)

<sup>1</sup> These authors contributed equally.

**Table S1.** Elemental analysis and contents of the N functionalities for the samples.

|         | Elemental analysis (wt%) |      |       | XPS(At%) |      | % of N1s |       |       |
|---------|--------------------------|------|-------|----------|------|----------|-------|-------|
|         | C                        | H    | N     | C        | N    | N-Q      | N-5   | N-6   |
| PFC-500 | 82.72                    | 3.06 | 2.295 | 87.04    | 1.33 | 35.08    | 34.71 | 30.2  |
| PFC-600 | 86.87                    | 2.26 | 2.295 | 88.43    | 1.3  | 35.5     | 28.94 | 35.56 |
| PFC-700 | 87.65                    | 1.51 | 2.105 | 85.37    | 0.89 | 37.07    | 27.55 | 35.38 |
